# Supplementary material for: Parallel Evolution of Tobramycin Resistance across Species and Environments
Source: PubMed Central journal article supplement (PMC7251211; doi:10.1128/mbio.00932-20), 2020-05-26

## Minimal Media

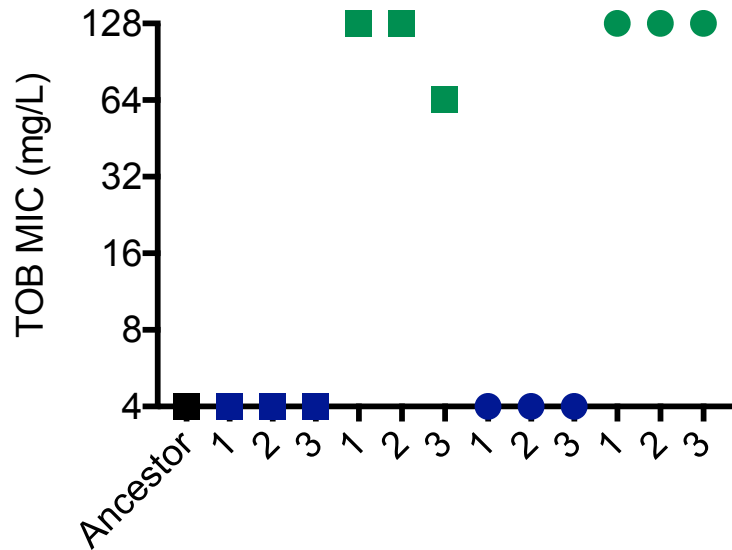

## Mueller Hinton Broth

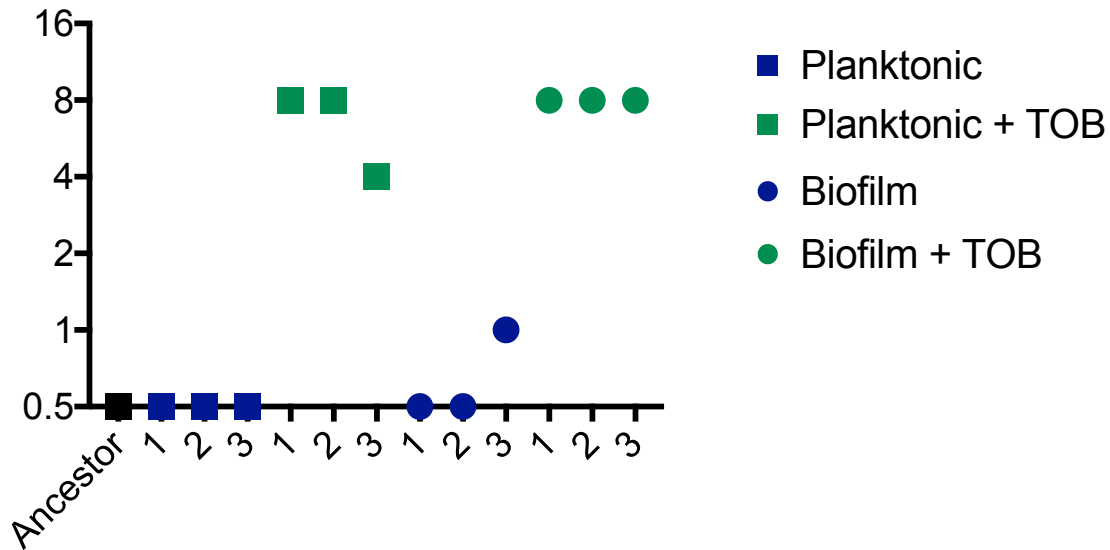

Supplement: mBio.00932-20-sf001.pdf [file mBio.00932-20-sf001.pdf]
