# Supplementary material for: Parallel Evolution of Tobramycin Resistance across Species and Environments
Source: PubMed Central journal article supplement (PMC7251211; doi:10.1128/mbio.00932-20), 2020-05-26

*A. baumannii*

*P. aeruginosa*

TOB -                      TOB +                      TOB -                      TOB +  
 Plank Biofilm    Plank    Biofilm    Plank Biofilm    Plank    Biofilm  
 1 2 3    1 2 3 4 5    1 2 3    1 2 3    1 2 3 4 5    1 2 3 4 5

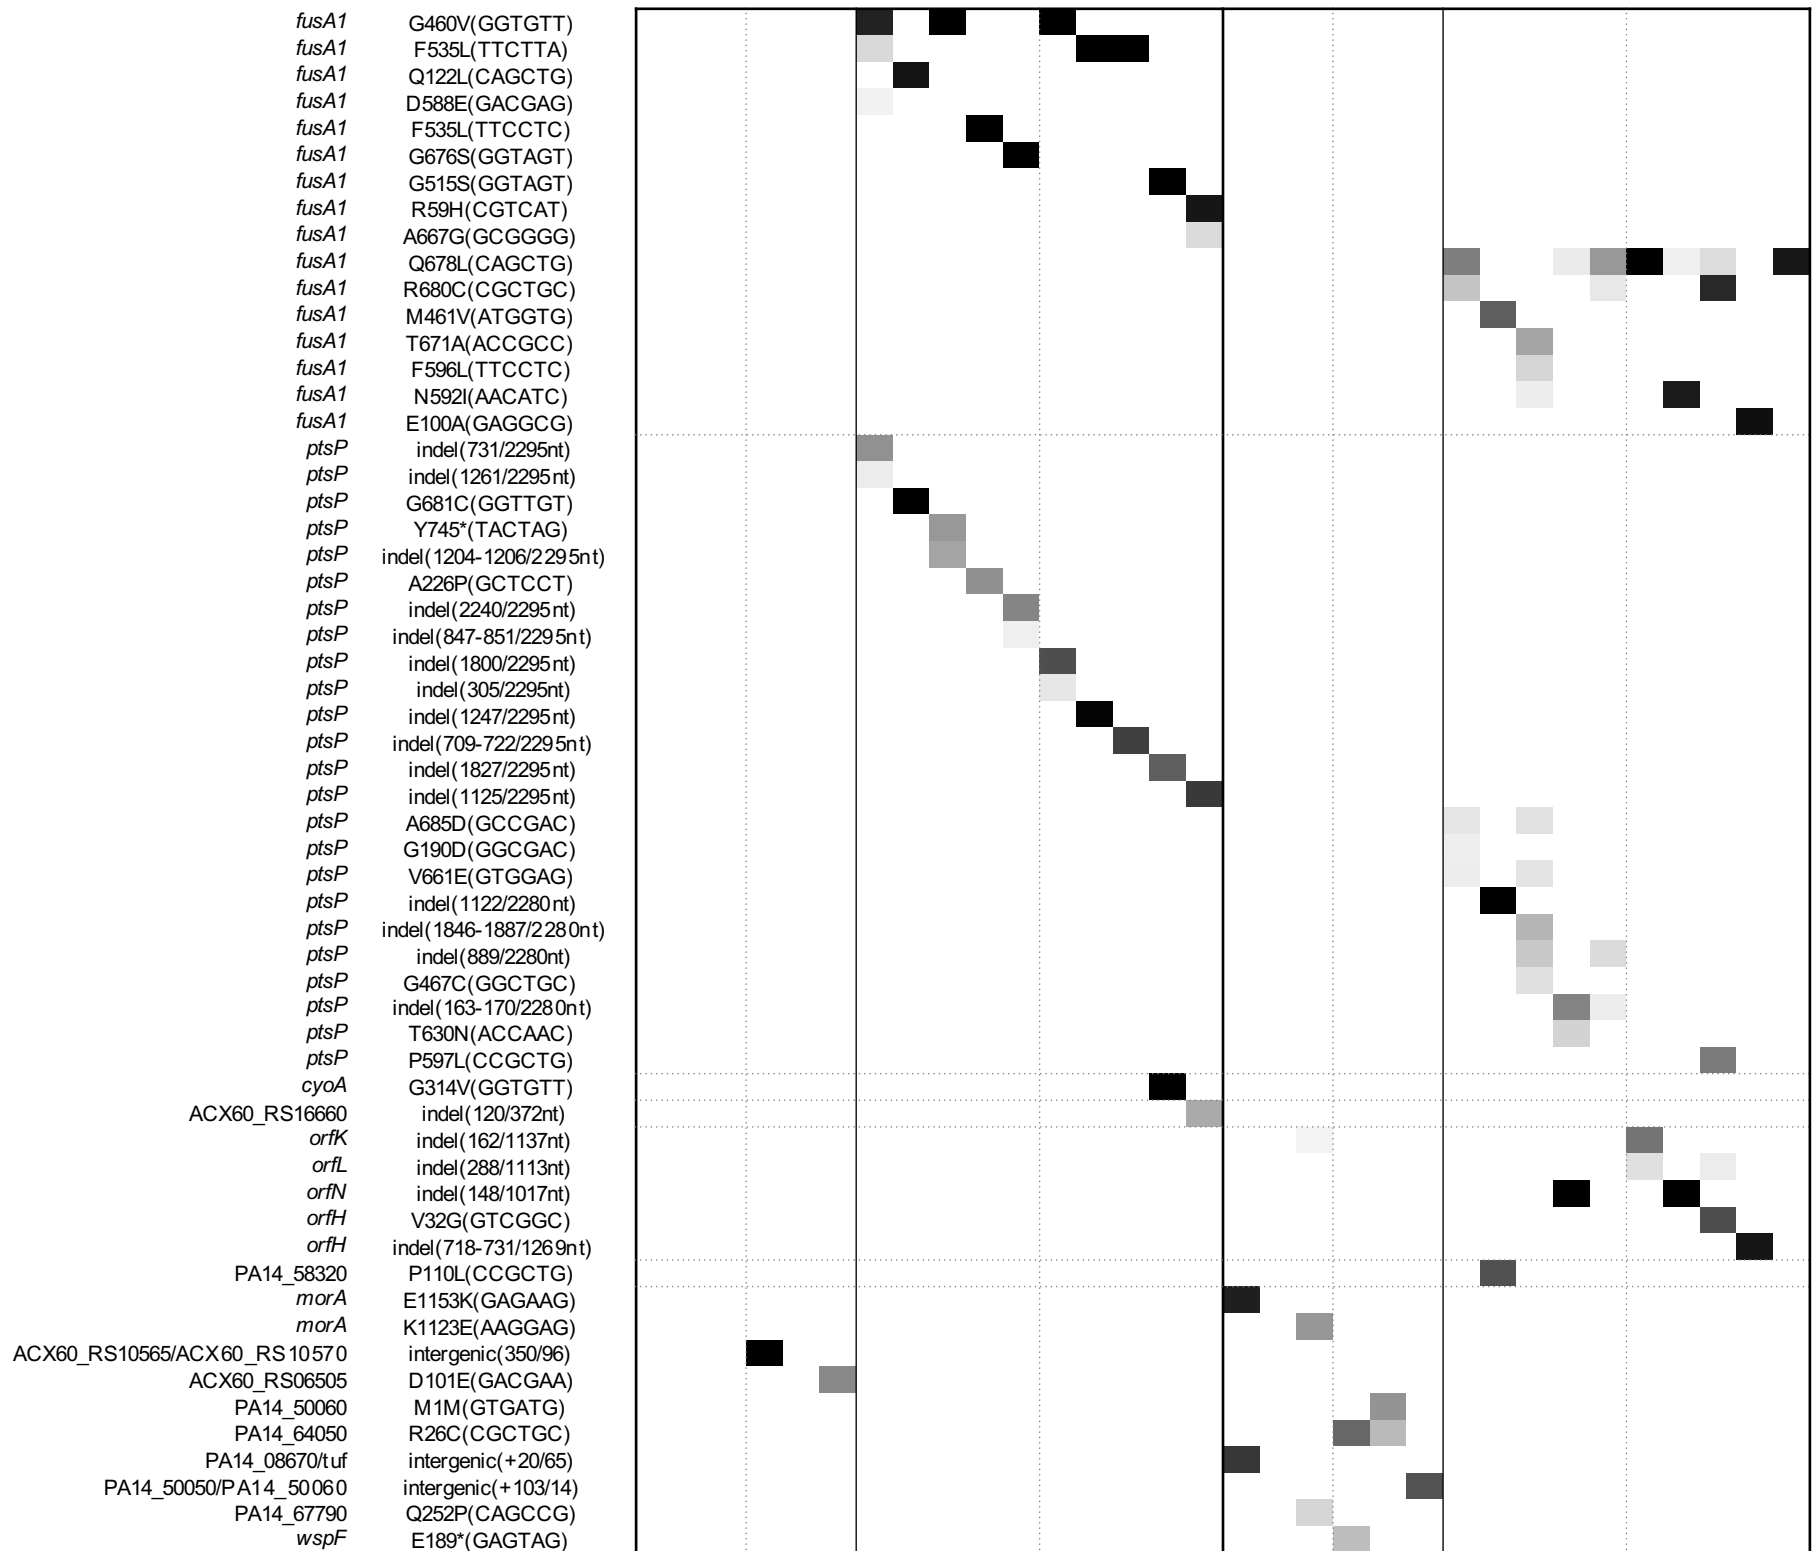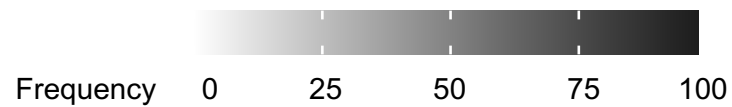

Supplement: mBio.00932-20-sf002.pdf [file mBio.00932-20-sf002.pdf]
