# Supplementary material for: Parallel Evolution of Tobramycin Resistance across Species and Environments
Source: PubMed Central journal article supplement (PMC7251211; doi:10.1128/mbio.00932-20), 2020-05-26

A

*A. baumannii*

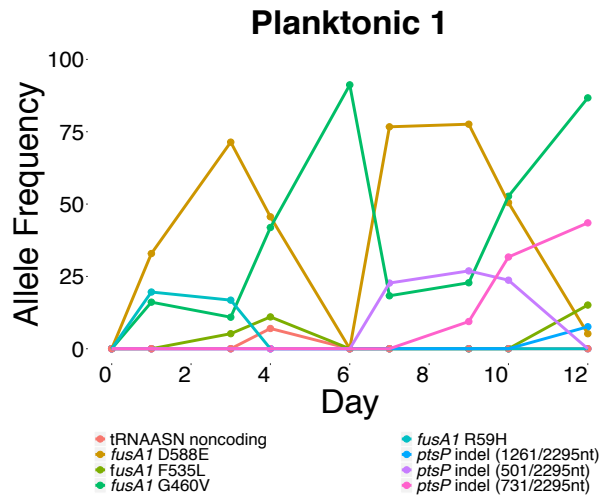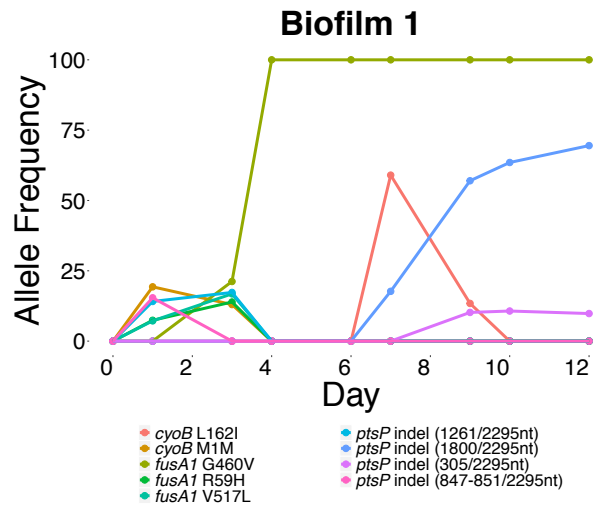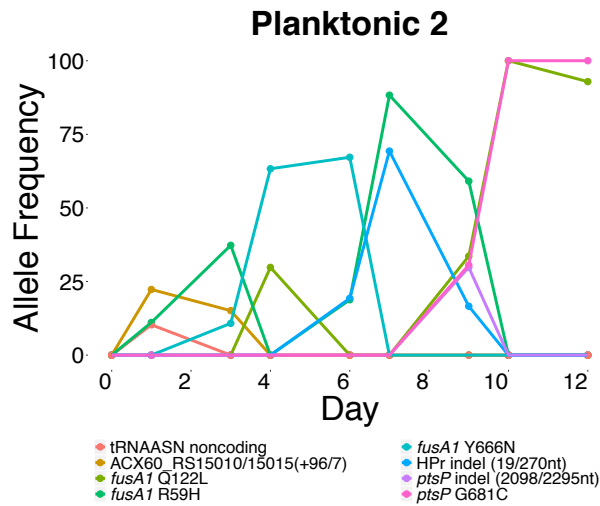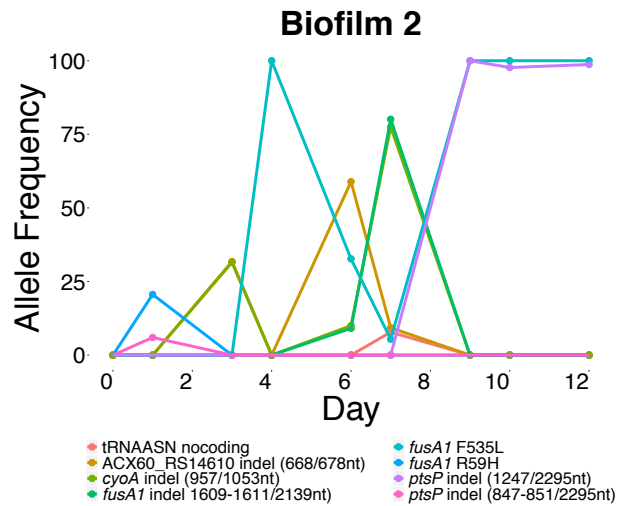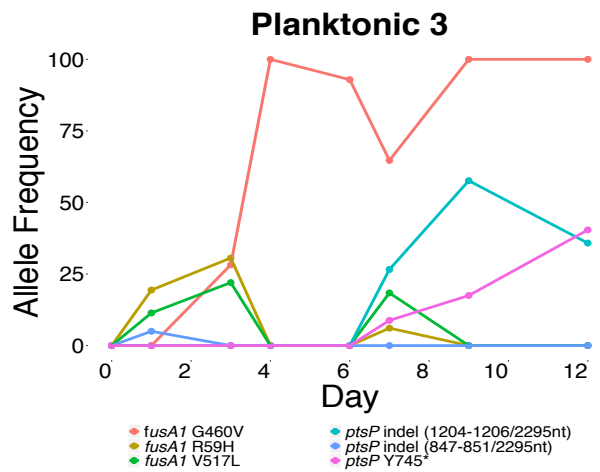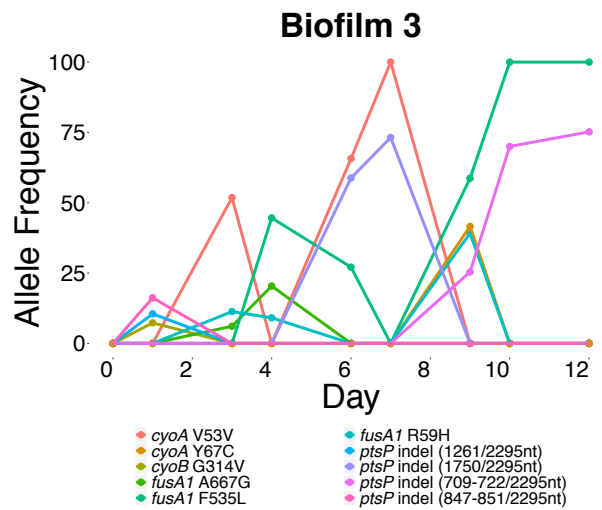

**B*****P. aeruginosa***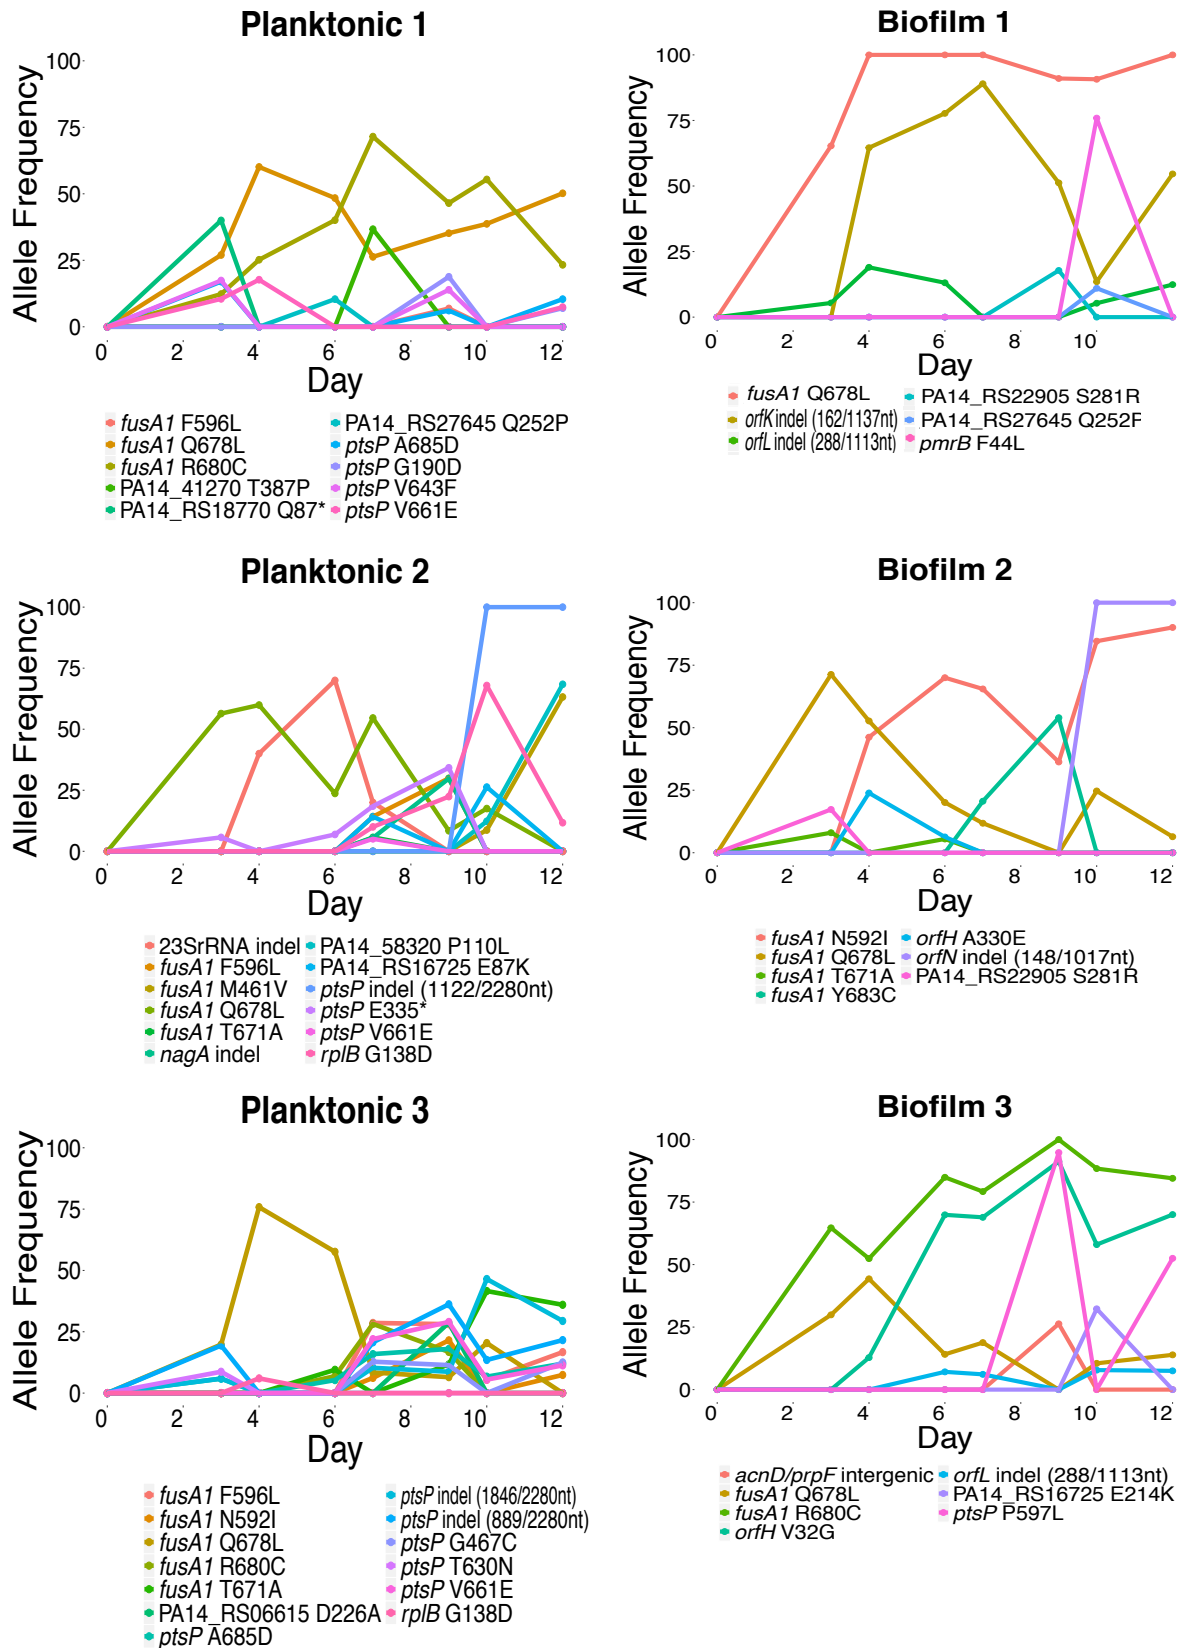

Supplement: mBio.00932-20-sf004.pdf [file mBio.00932-20-sf004.pdf]
